# Supplementary material for: The E3 Ligase PIAS1 Regulates p53 Sumoylation to Control Stress-Induced Apoptosis of Lens Epithelial Cells Through the Proapoptotic Regulator Bax
Source: PubMed Central journal article supplement (PMC8237824; doi:10.3389/fcell.2021.660494), 2021-06-14
Supplement: Data_Sheet_1.pdf [file Data_Sheet_1.pdf]

## Supplementary Data

### 1) Supplementary Figures

# Fig. S1

Nie et al.

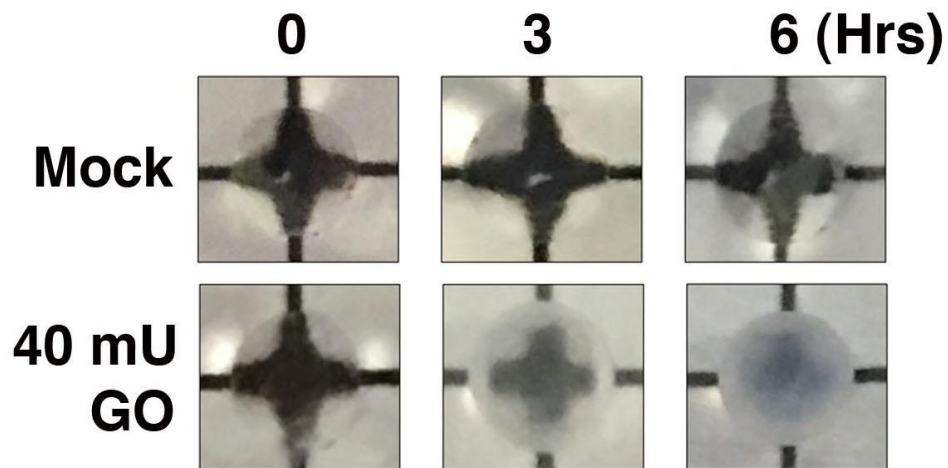

**Figure S1.** Glucose oxidase (GO) treatment-induced in vitro cataract model.

Lenses from four-week-old C57BL/6J mice were carefully excised from eyes and cultured in M199 medium (Sigma 3769) for at least 12 hours. The transparent lenses were then treated with 40 mU GO to induce cataract formation. Photographs of lenses with mock treatment (top) or 40 mU GO treatment for 0h, 3h and 6h (bottom). Note that after GO treatment, the transparent lens became opaque at the cortical area at 3-hour and almost complete opaque at 6-hour.

**Fig. S2**

**Nie et al.**

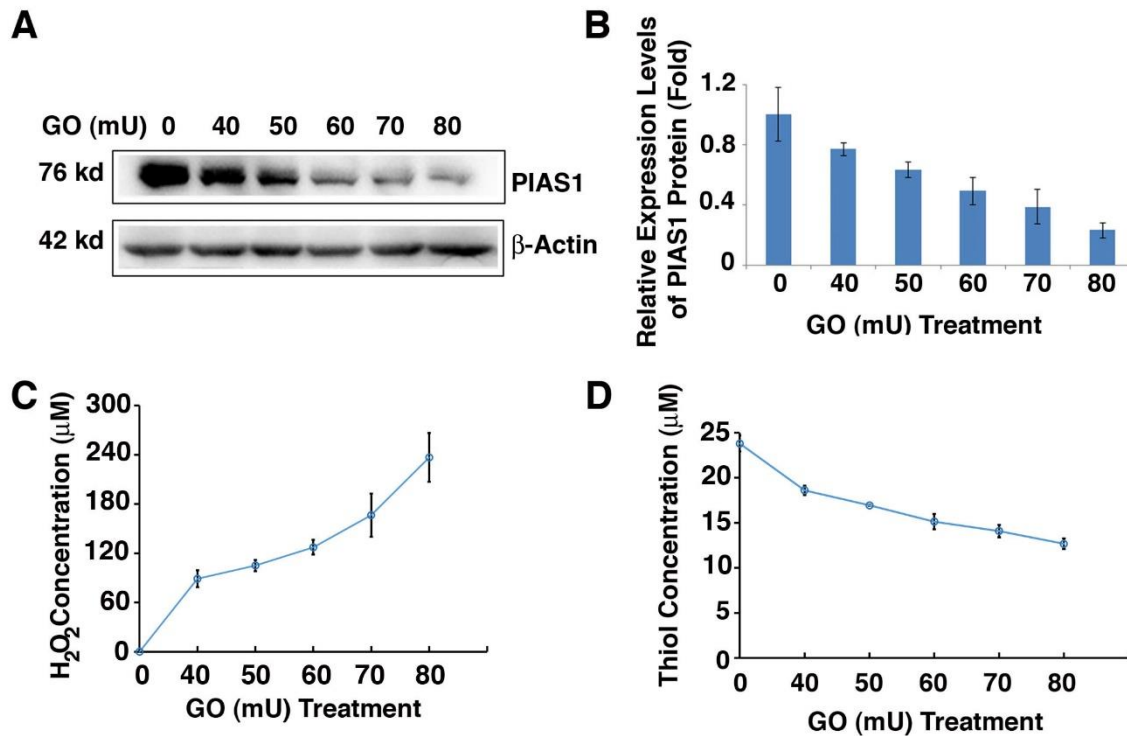

**Figure S2.** Oxidative stress induces dose-dependent PIAS1 downregulation under different amounts of GO treatment in lens epithelial cells.

(A) Western blot analysis showed the dose-dependent decrease in protein expression level of PIAS1 with different amounts of GO treatment as indicated for three hours. (B) Quantification of the western blot results in Figure S2A. (C) Dynamic H<sub>2</sub>O<sub>2</sub> concentration generated from 0 to 80 mU GO in  $\alpha$ TN4-1 cells for three hours. (D) Dynamic changes of free thiol content upon 0 to 80 mU GO treatment in  $\alpha$ TN4-1 cells for three hours. All experiments were repeated three times. Error bar represents standard deviation, N=3.

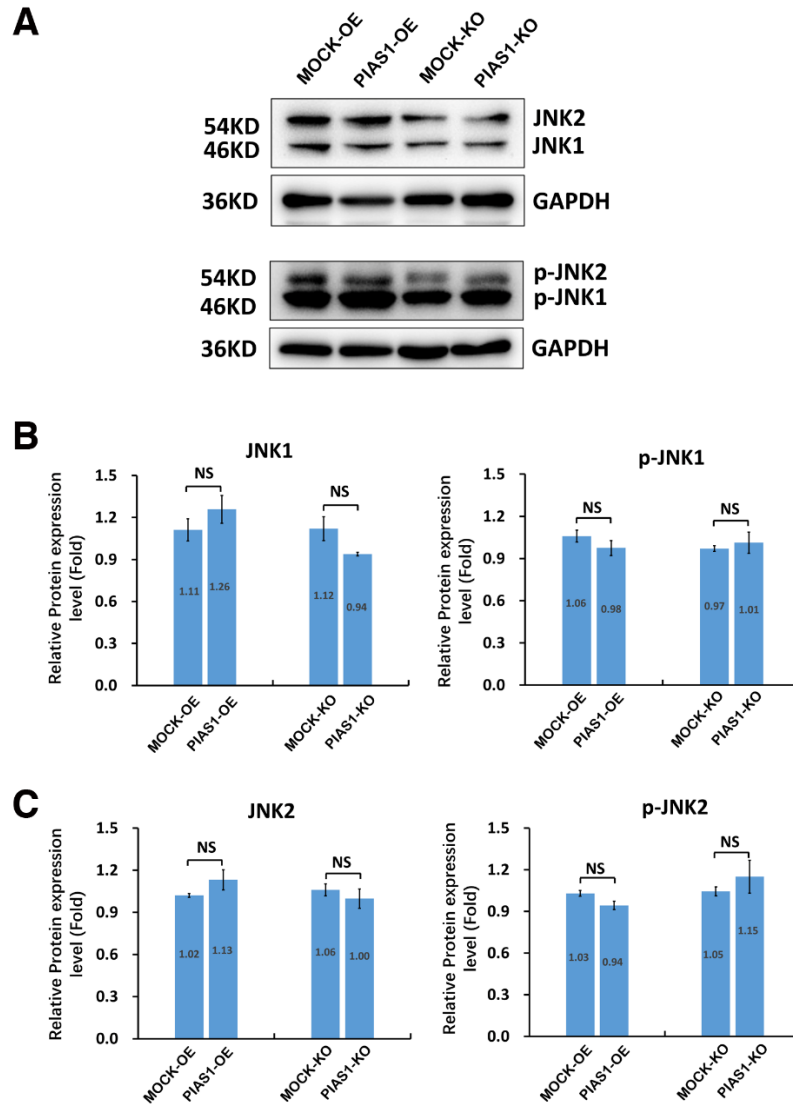

**Figure S3.** Changes of PIAS1 levels have no effect on the expression and activation of JNK in  $\alpha$ TN4-1 cells.

(A) Western blot analysis of the protein expression levels of JNK and p-JNK in MOCK OE and PIAS1-OE, MOCK-KO and PIAS1-KO cells. The GAPDH was used as a loading control.

(B-C) Quantification of the western blot results in Figure S3A. NS, not significant.

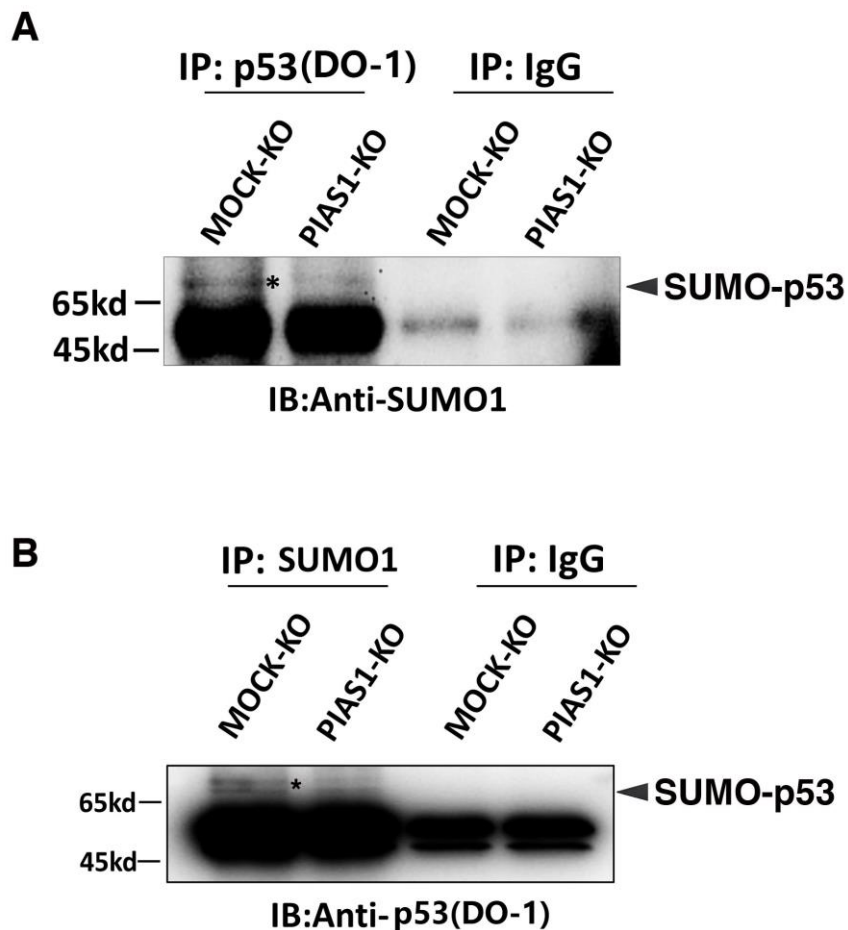

**Figure S4.** Sumoylation of endogenous p53 was mediated by PIAS1 in  $\alpha$ TN4-1 cells.

The total proteins from the MOCK-KO and PIAS1-KO  $\alpha$ TN4-1 cells were extracted with IP lysis buffer. (A) The extracted total proteins were then immunoprecipitated with anti-p53(DO-1) antibody followed by SUMO1 immunoblotting. (B) The extracted total proteins were then immunoprecipitated with anti-SUMO1 antibody followed by p53(DO-1) immunoblotting. The sumoylated p53 was labeled with\*.

## Fig. S5

Nie et al.

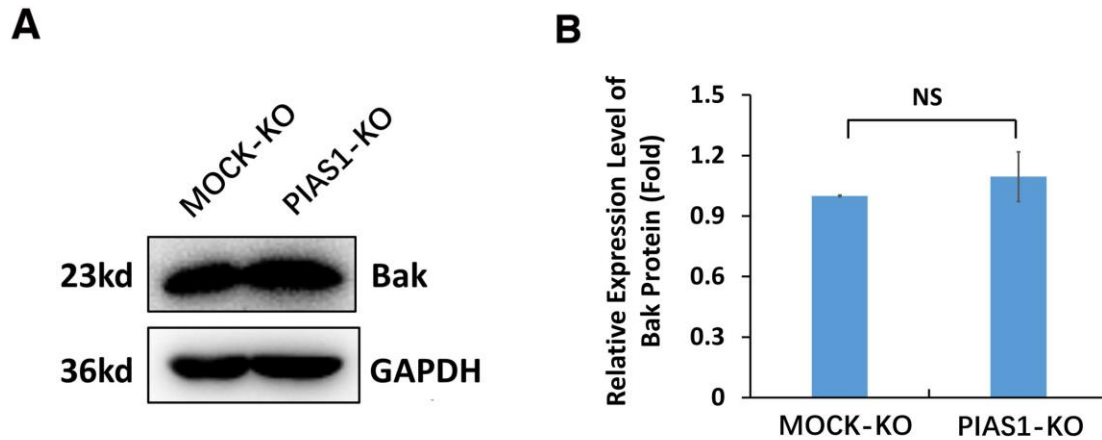

**Figure S5.** Western blot result of Bak expression, another member of Bcl-2 family in  $\alpha$ TN4-1-MOCK-KO and  $\alpha$ TN4-1-PIAS1-KO cells.

(A) Western blot analysis of the expression level of Bak in  $\alpha$ TN4-1-MOCK-KO and  $\alpha$ TN4-1-PIAS1-KO cells. The GAPDH was used as a loading control. (B) Quantification of the western blot results in Figure S5A. NS, not significant.

**Fig. S6**

**Nie et al.**

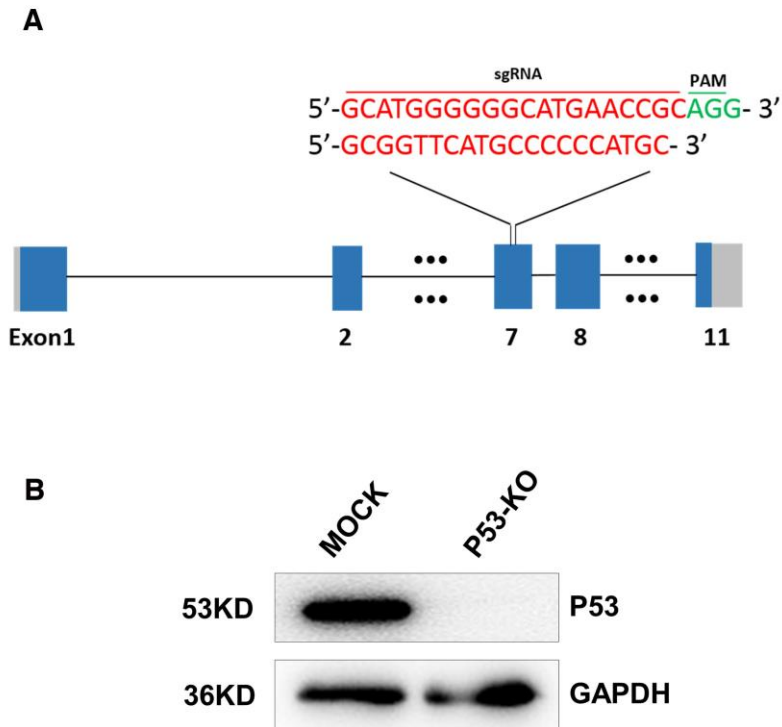

**Figure S6.** Generation and characterization of p53 knockout  $\alpha$ TN4-1 cells.

(A) Schematic diagram of the strategy for generating the p53 knockout cells by CRISPR/Cas9 gene editing technology. Two sets of sgRNAs were used to generate the knockout cell line. (B) Western blot analysis of the expression levels of p53 in MOCK-KO and p53 knockout (p53-KO) cells. Note that p53 was not detectable in p53-KO cells. The GAPDH was used as a loading control.

## 2) Supplementary Tables

**Table S1.** Primers used in gene knockout, overexpression, point mutation, qRT-PCR, Luciferase assay and ChIP-qPCR assay.

| Primer Name                                | Primer direction | Primer sequences                            |
|--------------------------------------------|------------------|---------------------------------------------|
| Mouse-PIAS1<br>(qRT-PCR)                   | F                | CAGTGCGGAAGCTAAAGCAAATGG                    |
|                                            | R                | GGAACCGCCTCTGTAGAGT                         |
| Mouse PIAS1 sgRNA<br>(Knockout)            | F                | CACCGAACAGGTTTCCCGAAAGCGC                   |
|                                            | R                | AAACGCGCTTTCGGGAAACCTGTTC                   |
| Mouse p53 sgRNA<br>(Knockout)              | F                | CACCGCGTTTCATGCCCCCATGC                     |
|                                            | R                | AAACGCATGGGGGGCATGAACCGC                    |
| Mouse Bax sgRNA1<br>(Knockout)             | F                | CCGGCGAATTGGAGATGAACTGG                     |
|                                            | R                | CCAGTTCATCTCCAATTCGCCGG                     |
| Mouse Bax sgRNA2<br>(Knockout)             | F                | CCCCCGAGAGGTCTTCTTC                         |
|                                            | R                | GAAGAAGACCTTCGGGGGG                         |
| Mouse PIAS1 in pEGFP<br>(Overexpression)   | F                | CGGAATTCTGATGGCGGACAGTGC GGAA               |
|                                            | R                | CGGGATCCTCAGTCCAATGAGATAAT                  |
| Mouse PIAS1 in p3×FLAG<br>(Overexpression) | F                | CGCAAGCTTATGGCGGACAGTGC GGAACTAAA           |
|                                            | R                | ATGGGTACCTCAGTCCAATGAGATAATGTCTGGTATGATGCCA |
| Mouse PIAS1 C351S<br>(Point Mutation)      | F                | CTGAAGGTGGGAGGAGGTAAGTGCCCG                 |
|                                            | R                | CGGGCACTTACCTCCTCCACCTTCAG                  |
| Mouse p53 in p3×HA<br>(Overexpression)     | F                | CGGAATTCATGACTGCCATGGAGGAGT                 |
|                                            | R                | GCTCTAGATGGGGAACAAGAAGTGGAG                 |
| Mouse-Bax<br>(qRT-PCR)                     | F                | AGGATGCGTCCACCAAG                           |
|                                            | R                | AAAGTAGAAGAGGGCAACCA                        |
| Mouse-β-actin<br>(qRT-PCR)                 | F                | TAGGCACCAGGGTGTGATGG                        |
|                                            | R                | CTCCATGTCGTCCAGTTGGT                        |
| Mouse-Bax-Promoter<br>(Luciferase Assay)   | F                | GGGGTACCGCTTTGGGCTCGGGCGGGAG                |
|                                            | R                | CCCAAGCTTAAGCAAACAGACCCCAAGCT               |
| Mouse-Bax<br>(ChIP-qPCR)                   | F                | AGAGGCAGCGGCAGTGAT                          |
|                                            | R                | GCTCCACAGCAAACCCAGA                         |

**Table S2.** Primary antibodies used in Western blot, Co-IP and ChIP assays.

| <b>Primary Antibody</b> | <b>Cat. Number</b>                 |
|-------------------------|------------------------------------|
| PIAS1                   | Cell Signaling Technology ; 3550   |
| GFP                     | Beijing Ray Biotech ; RM1008       |
| p53 (DO-1)              | Santa Cruz Biotechnology ; sc-126  |
| p53                     | Cell Signaling Technology ; 2524   |
| SUMO1                   | Sigma-Aldrich ; 8070               |
| Flag                    | Sigma-Aldrich ; F1804              |
| Bax                     | abCam ; ab32503                    |
| $\beta$ -actin          | Proteintech ; 66009                |
| GAPFH                   | Proteintech ; 60004                |
| JNK                     | Cell Signaling Technology ; 9252   |
| p-JNK                   | Santa Cruz Biotechnology ; sc-6254 |
| Bak                     | Cell Signaling Technology ; 12105  |
